# Supplementary material
Source: MDPI journal article supplement (https://www.mdpi.com/2306-5338/9/6/95)
Supplement: s1 [file s1]

TABLE S1: Location, anion concentration and isotope data for samples used in this study.

| GROUNDWATER               |      |            |               |                |                          |                          |           |                        |                            |         |                        |                             |                        |                       |        |
|---------------------------|------|------------|---------------|----------------|--------------------------|--------------------------|-----------|------------------------|----------------------------|---------|------------------------|-----------------------------|------------------------|-----------------------|--------|
| Sample name               | Site | Date       | Latitude<br>° | Longitude<br>° | Screen<br>upper<br>m bgs | Screen<br>lower<br>m bgs | Cl<br>ppm | SO <sub>4</sub><br>ppm | Cl/SO <sub>4</sub><br>(wt) | 100/SO4 | δ <sup>34</sup> S<br>‰ | δ <sup>18</sup> O(SO4)<br>‰ | δ <sup>18</sup> O<br>‰ | δ <sup>2</sup> H<br>‰ | Source |
| Mountain front wells (MF) |      |            |               |                |                          |                          |           |                        |                            |         |                        |                             |                        |                       |        |
| SYP                       |      | 2003       | 31.883        | -106.436       | 131.1                    | 137.2                    | 90        | 64                     | 1.40                       | 1.55    | 6.9                    |                             | -8.8                   | -62                   | [15]   |
| SYP                       |      | 2003       | 31.883        | -106.436       | 149.4                    | 155.5                    | 27        | 49                     | 0.54                       | 2.04    |                        |                             |                        |                       | [15]   |
| SYP                       |      | 2003       | 31.883        | -106.436       | 175.3                    | 181.4                    | 25        | 48                     | 0.52                       | 2.09    | 9.8                    |                             | -8.9                   | -61                   | [15]   |
| SYP                       |      | 2003       | 31.883        | -106.436       | 189.0                    | 195.1                    | 20        | 35                     | 0.58                       | 2.87    |                        |                             |                        |                       | [15]   |
| SYP                       |      | 2003       | 31.883        | -106.436       | 211.9                    | 218.0                    | 33        | 37                     | 0.87                       | 2.67    | 7.8                    |                             | -8.8                   | -65                   | [15]   |
| SYP                       |      | 2003       | 31.883        | -106.436       | 222.6                    | 228.7                    | 25        | 36                     | 0.70                       | 2.75    |                        |                             |                        |                       | [15]   |
| SYP                       |      | 2003       | 31.883        | -106.436       | 271.3                    | 277.4                    | 37        | 30                     | 1.24                       | 3.37    | 7.9                    |                             | -9.2                   | -64                   | [15]   |
| SYP                       |      | 2003       | 31.883        | -106.436       | 247.0                    | 253.0                    | 26        | 37                     | 0.68                       | 2.67    |                        |                             |                        |                       | [15]   |
| SYP                       |      | 2003       | 31.883        | -106.436       | 298.8                    | 304.9                    | 145       | 82                     | 1.76                       | 1.22    | 7.2                    |                             | -9.7                   | -69                   | [15]   |
| Wainwright                |      | 2003       | 31.589        | -106.438       | 146.3                    | 152.4                    | 70        | 87                     | 0.81                       | 1.15    | 9.2                    |                             | -8.7                   | -62                   | [15]   |
| Wainwright                |      | 2003       | 31.589        | -106.438       | 169.2                    | 175.3                    | 17        | 43                     | 0.39                       | 2.33    | 9.8                    |                             | -8.8                   | -62                   | [15]   |
| Wainwright                |      | 2003       | 31.589        | -106.438       | 186.0                    | 192.1                    | 23        | 44                     | 0.52                       | 2.26    | 9.4                    |                             | -8.9                   | -61                   | [15]   |
| Wainwright                |      | 2003       | 31.589        | -106.438       | 207.3                    | 213.4                    | 28        | 50                     | 0.56                       | 1.99    | 10.0                   |                             | -8.8                   | -62                   | [15]   |
| Wainwright                |      | 2003       | 31.589        | -106.438       | 227.1                    | 233.2                    | 26        | 40                     | 0.65                       | 2.53    | 9.5                    |                             |                        |                       | [15]   |
| Wainwright                |      | 2003       | 31.589        | -106.438       | 248.5                    | 254.6                    | 53        | 33                     | 1.60                       | 2.99    | 9.0                    |                             |                        |                       | [15]   |
| Wainwright                |      | 2003       | 31.589        | -106.438       | 269.8                    | 275.9                    | 209       | 26                     | 8.19                       | 3.92    | 8.2                    |                             | -9.5                   | -66                   | [15]   |
| Wainwright                |      | 2003       | 31.589        | -106.438       | 288.1                    | 294.2                    | 520       | 17                     | 30.65                      | 5.90    | 6.7                    |                             |                        |                       | [15]   |
| Wainwright                |      | 2003       | 31.589        | -106.438       | 301.8                    | 307.9                    | 559       | 16                     | 35.58                      | 6.37    | 7.2                    |                             | -9.7                   | -68                   | [15]   |
| Central Basin wells (CB)  |      |            |               |                |                          |                          |           |                        |                            |         |                        |                             |                        |                       |        |
| FBT2                      |      | 11/8/2002  | 31.941        | -106.201       | 207.3                    | 213.4                    | 1740      | 605                    | 2.87                       | 0.17    | 6.7                    | 11.4                        | -9.6                   | -69                   | [15]   |
| FBT2                      |      | 11/8/2002  | 31.941        | -106.201       | 225.6                    | 231.7                    | 1096      | 456                    | 2.41                       | 0.22    | 9.9                    | 10.4                        | -9.8                   | -71                   | [15]   |
| FBT2                      |      | 11/8/2002  | 31.941        | -106.201       | 234.8                    | 240.9                    | 1826      | 614                    | 2.98                       | 0.16    | 10.3                   | 10.0                        | -9.8                   | -70                   | [15]   |
| FBT2                      |      | 11/7/2002  | 31.941        | -106.201       | 268.3                    | 274.4                    | 2708      | 669                    | 4.05                       | 0.15    | 7.8                    |                             | -9.6                   | -69                   | [15]   |
| FBT2                      |      | 11/7/2002  | 31.941        | -106.201       | 292.7                    | 298.8                    | 8398      | 1750                   | 4.80                       | 0.06    | 8.7                    | 11.0                        | -9.2                   | -68                   | [15]   |
| FBT2                      |      | 2002       | 31.941        | -106.201       | 304.9                    | 311.0                    | 8354      | 1963                   | 4.26                       | 0.05    | 10.9                   | 11.1                        | -8.9                   | -66                   | [15]   |
| FBT3                      |      | 2002       | 31.815        | -106.312       | 149.4                    | 155.5                    | 289       | 133                    | 2.17                       | 0.75    | 9.2                    |                             | -10.1                  | -71                   | [15]   |
| FBT3                      |      | 2002       | 31.815        | -106.312       | 164.6                    | 170.7                    | 390       | 137                    | 2.85                       | 0.73    | 11.1                   |                             | -10.0                  | -71                   | [15]   |
| FBT3                      |      | 2002       | 31.815        | -106.312       | 182.9                    | 189.0                    | 391       | 124                    | 3.15                       | 0.81    | 10.2                   |                             | -10.1                  | -72                   | [15]   |
| FBT3                      |      | 2002       | 31.815        | -106.312       | 198.2                    | 204.3                    | 444       | 133                    | 3.34                       | 0.75    | 10.5                   |                             | -10.3                  | -73                   | [15]   |
| FBT3                      |      | 2002       | 31.815        | -106.312       | 228.7                    | 234.8                    | 1539      | 432                    | 3.56                       | 0.23    | 10.6                   |                             | -10.4                  | -75                   | [15]   |
| FBT3                      |      | 2002       | 31.815        | -106.312       | 243.9                    | 250.0                    | 2170      | 715                    | 3.03                       | 0.14    | 10.5                   |                             | -10.3                  | -74                   | [15]   |
| FBT3                      |      | 2002       | 31.815        | -106.312       | 292.7                    | 298.8                    | 5008      | 1143                   | 4.38                       | 0.09    | 10.3                   |                             | -9.7                   | -71                   | [15]   |
| FBT6                      |      | 10/20/2002 | 31.893        | -106.288       | 140.2                    | 146.3                    | 802       | 341                    | 2.35                       | 0.29    | 15.9                   | 14.7                        | -9.6                   | -69                   | [15]   |
| FBT6                      |      | 10/20/2002 | 31.893        | -106.288       | 164.6                    | 170.7                    | 733       | 151                    | 4.84                       | 0.66    | 9.4                    | 5.9                         | -10.3                  | -73                   | [15]   |
| FBT6                      |      | 10/19/2002 | 31.893        | -106.288       | 189.0                    | 195.1                    | 1010      | 101                    | 9.97                       | 0.99    | 6.2                    | 5.9                         | -10.7                  | -76                   | [15]   |
| FBT6                      |      | 10/19/2002 | 31.893        | -106.288       | 210.4                    | 216.5                    | 1529      | 269                    | 5.69                       | 0.37    | 9.2                    |                             | -10.6                  | -75                   | [15]   |
| FBT6                      |      | 10/19/2002 | 31.893        | -106.288       | 227.1                    | 233.2                    | 1849      | 478                    | 3.87                       | 0.21    | 8.1                    | 10.7                        | -10.5                  | -75                   | [15]   |
| FBT6                      |      | 10/18/2002 | 31.893        | -106.288       | 269.8                    | 275.9                    | 2810      | 944                    | 2.98                       | 0.11    | 13.7                   | 10.8                        | -10.0                  | -71                   | [15]   |
| FBT6                      |      | 11/1/2002  | 31.893        | -106.288       | 310.4                    | 316.5                    | 4462      | 1936                   | 2.31                       | 0.05    | 13.5                   |                             | -9.5                   | -69                   | [15]   |
| FBT8                      |      | 11/1/2002  | 31.838        | -106.207       | 146.3                    | 152.4                    | 360       | 673                    | 0.54                       | 0.15    | 12.8                   |                             | -8.0                   | -63                   | [15]   |
| FBT8                      |      | 10/31/2002 | 31.838        | -106.207       | 155.5                    | 161.6                    | 361       | 714                    | 0.51                       | 0.14    | 8.7                    |                             | -8.1                   | -64                   | [15]   |
| FBT8                      |      | 10/31/2002 | 31.838        | -106.207       | 170.7                    | 176.8                    | 435       | 314                    | 1.39                       | 0.32    | 4.6                    |                             | -9.0                   | -66                   | [15]   |
| FBT8                      |      | 10/31/2002 | 31.838        | -106.207       | 189.0                    | 195.1                    | 748       | 198                    | 3.78                       | 0.51    | 4.9                    |                             | -8.9                   | -67                   | [15]   |
| FBT8                      |      | 10/31/2002 | 31.838        | -106.207       | 240.9                    | 247.0                    | 862       | 155                    | 5.58                       | 0.65    | 5.4                    |                             | -10.0                  | -72                   | [15]   |
| FBT8                      |      | 10/30/2002 | 31.838        | -106.207       | 259.1                    | 265.2                    | 2277      | 391                    | 5.82                       | 0.26    | 9.5                    |                             | -9.6                   | -71                   | [15]   |
| FBT9                      |      | 11/20/2002 | 31.853        | -106.281       | 112.8                    | 118.9                    | 420       | 127                    | 3.30                       | 0.79    | 12.8                   |                             | -8.2                   | -58                   | [15]   |
| FBT9                      |      | 11/20/2002 | 31.853        | -106.281       | 141.8                    | 147.9                    | 318       | 77                     | 4.12                       | 1.30    | 7.5                    |                             | -9.6                   | -67                   | [15]   |
| FBT9                      |      | 11/20/2002 | 31.853        | -106.281       | 181.4                    | 187.5                    | 1057      | 244                    | 4.33                       | 0.41    | 4.6                    |                             | -9.0                   | -66                   | [15]   |
| FBT9                      |      | 11/19/2002 | 31.853        | -106.281       | 237.8                    | 243.9                    | 1388      | 342                    | 4.05                       | 0.29    | 18.1                   |                             | -9.7                   | -69                   | [15]   |
| FBT9                      |      | 11/19/2002 | 31.853        | -106.281       | 277.4                    | 283.5                    | 4550      | 1559                   | 2.92                       | 0.06    | 11.2                   |                             | -9.8                   | -70                   | [15]   |
| FBT9                      |      | 11/19/2002 | 31.853        | -106.281       | 295.7                    | 301.8                    | 4863      | 1661                   | 2.93                       | 0.06    | 11.3                   |                             | -9.8                   | -71                   | [15]   |

[illegible]

**Floodplain Groundwater post-dam**

|                      |    |            |        |          |
|----------------------|----|------------|--------|----------|
| Fabens Flores/Church | 8  | 11/14/2002 | 31.486 | -106.204 |
| Rangel               | 9  | 1/5/2003   | 31.674 | -106.278 |
| Fabens Church Well   | 8  | 3/21/2004  | 31.486 | -106.204 |
| 5R #7                | 3  | 6/5/2003   | 31.401 | -106.082 |
| 5R 30S               | 10 | 6/5/2003   | 31.420 | -106.069 |
| Blue Thief Well      | 11 | 5/3/2004   | 31.533 | -106.231 |
| Augustine Well       | 12 | 5/4/2004   | 31.477 | -106.157 |
| Hansen 4-T Well      | 13 | 7/14/2004  | 31.499 | -106.187 |
| Oriando Flores Well  | 14 | 5/4/2004   | 31.499 | -106.204 |
| Felipe Payan well    | 15 | 5/5/2004   | 31.462 | -106.184 |
| Vasquez Well         | 16 | 5/5/2004   | 31.442 | -106.149 |
| Aliens 2000          | 17 | 5/5/2004   | 31.471 | -106.197 |
| JL-49-21-324         | 1  | 7/8/2002   | 31.311 | -106.327 |
| JL-49-21-320         | 1  | 7/9/2002   | 31.311 | -106.327 |
| JL-49-21-319         | 1  | 7/9/2002   | 31.311 | -106.327 |

11.5  
37.6  
57.9

38  
124  
191

|      |      |      |      |      |      |      |     |      |
|------|------|------|------|------|------|------|-----|------|
| 285  | 345  | 0.83 | 0.29 | 3.4  | 11.4 | -7.5 | -66 | [18] |
| 671  | 1201 | 0.56 | 0.08 | 1.7  | 7.8  | -8.0 | -68 | [18] |
| 321  | 204  | 1.58 | 0.49 | 22.5 | 13.3 | -6.6 | -58 | [18] |
| 290  | 397  | 0.73 | 0.25 | 3.7  | 9.3  | -7.5 | -66 | U    |
| 511  | 939  | 0.54 | 0.11 | 2.1  | 7.8  | -7.3 | -65 | U    |
| 301  | 468  | 0.64 | 0.21 | 0.1  |      | -8.1 | -68 | U    |
| 248  | 366  | 0.68 | 0.27 | 1.7  |      | -8.4 | -72 | U    |
| 938  | 678  | 1.38 | 0.15 | 1.5  |      | -8.8 | -73 | U    |
| 452  | 688  | 0.66 | 0.15 | 1.1  |      | -7.8 | -68 | U    |
| 373  | 591  | 0.63 | 0.17 | 2.2  |      | -7.1 | -65 | U    |
| 582  | 889  | 0.65 | 0.11 | 0.8  |      | -8   | -69 | U    |
| 1852 | 1106 | 1.67 | 0.09 | 4.5  |      | -8.7 | -70 | U    |
| 211  | 351  | 0.60 |      | 1.1  |      | -7.2 | -66 | T    |
| 168  | 240  | 0.70 |      | 2.9  |      | -8   | -70 | T    |
| 291  | 274  | 1.06 |      | 3.3  |      | -8.3 | -71 | T    |

**Floodplain Groundwater pre-dam**

|                       |    |            |        |          |
|-----------------------|----|------------|--------|----------|
| 5R Fences Down        | 18 | 6/5/2003   | 31.434 | -106.064 |
| JL-49-21-323          | 1  | 7/11/2002  | 31.311 | -106.327 |
| JL-49-21-318          | 1  | 7/9/2002   | 31.311 | -106.327 |
| Miller House well     | 19 | 1/2/2003   | 31.288 | -105.867 |
| WWM Shallow well      | 20 | Dec 2003   | 31.018 | -105.576 |
| Hansen 4T2            | 21 | 7/14/2004  | 31.499 | -106.187 |
| Fabens 10th St.       | 22 | 11/13/2002 | 31.497 | -106.147 |
| Tornillo #2           | 23 | 9/19/2002  | 31.461 | -106.072 |
| Skov farms house well | 24 | 1/7/2003   | 31.382 | -105.974 |

174.5  
108.5

576  
358

|      |     |      |      |      |      |       |     |      |
|------|-----|------|------|------|------|-------|-----|------|
| 346  | 184 | 1.87 | 0.54 | 8.2  | 8.9  | -11.1 | -87 | [18] |
|      |     |      |      | 8.8  | 11.6 | -10.3 | -77 | T    |
| 1196 | 398 | 3.01 |      | 7.3  |      | -9.8  | -76 | T    |
| 360  | 200 | 1.80 | 0.50 | 8.4  | 5.6  | -10.9 | -84 | [18] |
| 3386 | 747 | 4.53 | 0.13 | 10.4 | 14.9 | -9.2  | -75 | T    |
| 914  | 582 | 1.57 | 0.17 | 3.9  | 7.4  | -10.2 | -81 | T    |
| 241  | 226 | 1.07 | 0.44 | 9.0  | 10.8 | -11.1 | -86 | T    |
| 173  | 204 | 0.85 | 0.49 | 4.8  | 11   | -11.5 | -90 | T    |
| 762  | 361 | 2.11 | 0.28 | 4.8  | 9.1  | -9.3  | -74 | [18] |

**Drains**

|                                  |    |           |        |          |
|----------------------------------|----|-----------|--------|----------|
| Riverside Drain                  | 25 | 6/2/2003  | 31.496 | -106.156 |
| Tornillo Drain                   | 26 | 6/5/2003  | 31.444 | -106.097 |
| Drain @ Alamo Arroyo             | 27 | 3/20/2004 | 31.313 | -105.908 |
| Drain @ Caseta                   | 28 | 3/19/2004 | 31.273 | -105.855 |
| Drain @ F                        | 29 | 3/20/2004 | 31.120 | -105.662 |
| Island Drain Midpoint            | 30 | 3/22/2004 | 31.460 | -106.160 |
| Island Drain Downstream          | 31 | 3/22/2004 | 31.443 | -106.145 |
| Island Drain Upstream            | 32 | 3/22/2004 | 31.501 | -106.205 |
| Fabens Drain Downstream          | 33 | 3/22/2004 | 31.445 | -106.140 |
| Fabens Drain Upstream            | 34 | 3/22/2004 | 31.500 | -106.168 |
| Border Spur Drain 1              | 35 | 5/4/2004  | 31.475 | -106.202 |
| Border Spur Drain 1.5            | 36 | 5/4/2004  | 31.473 | -106.198 |
| Border Spur Drain 2              | 37 | 5/4/2004  | 31.471 | -106.193 |
| Island Tornillo Seep 2           | 38 | 7/13/2004 | 31.433 | -106.106 |
| Island Drain Upstream            | 32 | 9/4/2004  | 31.501 | -106.205 |
| Island Drain Midpoint            | 30 | 9/4/2004  | 31.460 | -106.160 |
| Island Drain Downstream          | 31 | 9/4/2004  | 31.443 | -106.145 |
| Island Drain 0.3 Mi.             | 39 | 9/4/2004  | 31.465 | -106.163 |
| Island Drain Farmers 0.3 Mi.     | 40 | 9/4/2004  | 31.475 | -106.172 |
| Fabens Drain Downstream Seep     | 33 | 9/4/2004  | 31.445 | -106.140 |
| Island Drain Seep 1              | 41 | 9/5/2004  | 31.457 | -106.157 |
| Fabens Drain Seep 2              | 42 | 9/5/2004  | 31.452 | -106.136 |
| Island Drain Redhouse Seep       | 43 | 9/6/2004  | 31.459 | -106.157 |
| Fabens Drain Seep @ Confluence   | 44 | 9/7/2004  | 31.442 | -106.143 |
| Fabens Intercepting Drain Seep 1 | 45 | 9/8/2004  | 31.539 | -106.23  |
| Fabens Drain Seep 3              | 46 | 9/9/2004  | 31.456 | -106.139 |

|        |        |      |      |     |  |      |     |      |
|--------|--------|------|------|-----|--|------|-----|------|
| 126.4  | 249.3  | 0.51 | 0.40 | 2.6 |  | -5.7 | -59 | [18] |
| 754.1  | 908.7  | 0.83 | 0.11 | 3.3 |  | -7.4 | -67 | [18] |
| 907.6  | 916.8  | 0.99 | 0.11 | 3.5 |  | -6.6 | -62 | [18] |
| 471.8  | 438.3  | 1.08 | 0.23 | 9.4 |  | -8.2 | -71 | [18] |
| 2206.8 | 1695.9 | 1.30 | 0.06 | 5.5 |  | -5.9 | -59 | [18] |
| 1059.0 | 848.6  | 1.25 | 0.12 | 2.4 |  | -7.3 | -65 | U    |
| 1522.3 | 1045.9 | 1.46 | 0.10 | 3.1 |  | -7.4 | -65 | U    |
| 419.5  | 681.3  | 0.62 | 0.15 | 1.6 |  | -7.2 | -64 | U    |
| 198.7  | 235.6  | 0.84 | 0.42 | 2.4 |  | -6.2 | -57 | U    |
| 533.9  | 700.8  | 0.76 | 0.14 | 4.4 |  | -7.9 | -67 | U    |
| 950.1  | 1365.4 | 0.70 | 0.07 | 2.6 |  | -7.7 | -67 | U    |
| 1904.3 | 1341.8 | 1.42 | 0.07 | 2.9 |  | -8.1 | -68 | U    |
| 2350.4 | 1373.7 | 1.71 | 0.07 | 3.2 |  | -8.2 | -69 | U    |
| 4503.6 | 542.9  | 8.30 | 0.18 | 9.2 |  | -9.7 | -79 | U    |
| 428.1  | 660.7  | 0.65 | 0.15 | 1.8 |  | -7.5 | -65 | U    |
| 553.8  | 708.1  | 0.78 | 0.14 | 1.4 |  | -7.4 | -66 | U    |
| 1511.0 | 960.3  | 1.57 | 0.10 | 3.3 |  | -7.6 | -67 | U    |
| 1125.8 | 897.0  | 1.26 | 0.11 | 2.1 |  | -7.4 | -66 | U    |
| 757.4  | 810.6  | 0.93 | 0.12 | 1.9 |  | -7.4 | -66 | U    |
| 783.1  | 1272.1 | 0.62 | 0.08 | 2.0 |  | -7.2 | -65 | U    |
| 1612.3 | 1486.7 | 1.08 | 0.07 | 4.0 |  | -8.3 | -71 | U    |
| 2004.8 | 1528.4 | 1.31 | 0.07 | 3.2 |  | -8.3 | -71 | U    |
| 420.9  | 703.0  | 0.60 | 0.14 | 0.7 |  | -6.7 | -61 | U    |
| 537.7  | 724.7  | 0.74 | 0.14 | 1.0 |  | -7.5 | -66 | U    |
| 445.7  | 1246.7 | 0.36 | 0.08 | 1.7 |  | -6.6 | -61 | U    |
| 1477.6 | 1476.7 | 1.00 | 0.07 | 2.0 |  | -8.4 | -72 | U    |

**Mesilla Valley Terminus**

|                                  |    |           |        |          |
|----------------------------------|----|-----------|--------|----------|
| Sulfate crust @ Racetrack bridge | 47 | 1/25/2005 | 31.799 | -106.556 |
| Salt crust, Racetrack Drive      | 48 | 3/2/2005  | 31.803 | -106.553 |
| Salt crust, Racetrack Drive      | 48 | 3/2/2005  | 31.803 | -106.553 |
| Seep at Racetrack bridge         | 47 | 1/25/2005 | 31.799 | -106.556 |
| Seep at McNutt bridge            | 49 | 1/25/2005 | 31.803 | -106.541 |

16.9  
11.3  
15.8  
5.8  
12.1

-7.2  
-7.0

T  
T  
T  
T  
T

**SURFACE WATER**

| Sample name                                     |    | Date       | Latitude<br>° | Longitude<br>° | km   | Cl<br>ppm | SO <sub>4</sub><br>ppm | Cl/SO <sub>4</sub><br>(wt) | 100/SO <sub>4</sub> | δ <sup>34</sup> S<br>‰ | δ <sup>18</sup> O(SO <sub>4</sub> )<br>‰ | δ <sup>18</sup> O<br>‰ | δ <sup>2</sup> H<br>‰ | Source |
|-------------------------------------------------|----|------------|---------------|----------------|------|-----------|------------------------|----------------------------|---------------------|------------------------|------------------------------------------|------------------------|-----------------------|--------|
| Mesilla Valley terminus                         |    |            |               |                |      |           |                        |                            |                     |                        |                                          |                        |                       |        |
| Bridge                                          | 47 | 1/23/2005  | 31.799        | -106.556       | 1015 | 109       | 177                    | 0.62                       | 0.56                | 5.1                    |                                          | -5.5                   | -56                   | T      |
| Rio Grande at McNutt Bridge                     | 49 | 1/23/2005  | 31.803        | -106.541       | 1016 | 630       | 760                    | 0.83                       | 0.13                | 6.9                    |                                          | -8.0                   | -68                   | T      |
| Rio Grande at McNutt Bridge                     | 49 | 3/2/2005   | 31.803        | -106.541       | 1016 | 328       | 282                    | 1.16                       | 0.35                | 7.3                    |                                          | -8.4                   | -68                   | T      |
| Bridge                                          | 47 | 8/18/2005  | 31.799        | -106.556       | 1015 | 57        | 112                    | 0.51                       | 0.89                | 1.4                    |                                          | -10.3                  | -81                   | T      |
| El Paso (USGS well nest) to Clint, 1035-1060 km |    |            |               |                |      |           |                        |                            |                     |                        |                                          |                        |                       |        |
| Rio Grande #1                                   | 1  | 7/11/2002  | 31.739        | -106.393       | 1035 | 93        | 200                    | 0.47                       | 0.50                | 2.6                    |                                          | -6.0                   | -64                   | T      |
| Rio Grande #2                                   | 1  | 8/23/2002  | 31.739        | -106.393       | 1035 | 109       | 204                    | 0.53                       | 0.49                | 2.7                    | 8.5                                      | -6.2                   | -61                   | T      |
| Rio Grande #3                                   | 1  | 11/13/2002 | 31.739        | -106.393       | 1035 | 273       | 396                    | 0.69                       | 0.25                |                        |                                          | -7.3                   | -66                   | T      |
| Rio Grande #4                                   | 1  | 2/27/2003  | 31.739        | -106.393       | 1035 |           |                        |                            |                     | 4.3                    | 9.3                                      | -8.5                   | -68                   | T      |
| Rio Grande #5                                   | 1  | 1/6/2003   | 31.739        | -106.393       | 1035 |           |                        |                            |                     |                        | 8.5                                      | -7.6                   | -67                   | T      |
| Rio Grande #6                                   | 1  | 9/16/03    | 31.739        | -106.393       | 1035 | 768       | 1028                   | 0.75                       | 0.10                | 5.8                    | 9.0                                      | -1.7                   | -43                   | T      |
| Rio Grande @ well nest                          | 1  | 9/16/2003  | 31.739        | -106.393       | 1035 |           |                        |                            |                     |                        |                                          | -5.3                   | -56                   | T      |
| Rio Grande #7                                   | 1  | 3/20/2004  | 31.739        | -106.393       | 1035 | 202       | 241                    | 0.84                       | 0.41                | 2.7                    | 8.0                                      | -5.6                   | -56                   | T      |
| Rio Grande at Nest-5-6-04                       | 1  | 5/6/2004   | 31.739        | -106.393       | 1035 | 615       | 688                    | 0.89                       | 0.15                |                        |                                          | -6.9                   | -65                   | T      |
| Rio Grande @ El Paso*                           | 1  | 8/22/2001  | 31.739        | -106.393       | 1035 |           | 208.5                  |                            | 0.48                | 1.9                    |                                          | -7.0                   | -66                   | T      |
| Rio Grande @ Socorro*                           | 50 | 8/22/2001  | 31.642        | -106.317       | 1047 |           | 310.7                  |                            | 0.32                | 2.5                    |                                          |                        |                       | T      |
| Rio Grande @ Clint*                             | 51 | 8/22/2001  | 31.550        | -106.257       | 1060 |           | 316.3                  |                            | 0.32                | 3.3                    |                                          |                        |                       | T      |
| Rio Grande @ Socorro*                           | 50 |            | 31.642        | -106.317       | 1047 |           | 324.7                  |                            | 0.31                | 2.4                    |                                          |                        |                       | T      |
| Rio Grande @ Clint*                             | 51 |            | 31.550        | -106.257       | 1060 |           | 495.3                  |                            | 0.20                | 3.2                    |                                          |                        |                       | T      |
| Rio Grande TR4                                  | 52 | 7/12/2004  | 31.658        | -106.328       | 1058 | 442       | 477                    | 0.93                       | 0.21                | 10.5                   | 9.6                                      | -6.5                   | -63                   | T      |
| Rio Grande TR4                                  | 52 | 5/6/2004   | 31.658        | -106.328       | 1058 | 319       | 340                    | 0.94                       | 0.29                |                        |                                          | -7.5                   | -68                   | T      |
| Fabens area, 1065-1073 km                       |    |            |               |                |      |           |                        |                            |                     |                        |                                          |                        |                       |        |
| Rio Grande @ Isla/Fabens                        | 53 | 8/10/2003  | 31.457        | -106.179       | 1069 | 731       | 740                    | 0.99                       | 0.14                | 8.9                    |                                          | -6.9                   | -64                   | T      |
| Rio Grande Isla                                 | 53 | 12/03      | 31.457        | -106.179       | 1069 | 325       | 335                    | 0.97                       | 0.30                | 4.1                    |                                          | -8.1                   | -68                   | T      |
| Rio Grande @ Isla/Fabens                        | 53 | 3/20/2004  | 31.457        | -106.179       | 1069 | 349       | 345                    | 1.01                       | 0.29                | 6.2                    |                                          | -6.8                   | -61                   | T      |
| Rio Grande Isla                                 | 53 | 5/6/2004   | 31.457        | -106.179       | 1069 | 625       | 652                    | 0.96                       | 0.15                |                        |                                          | -7.8                   | -69                   | T      |
| Rio Grande Isla                                 | 53 | 7/12/2004  | 31.457        | -106.179       | 1069 | 443       | 460                    | 0.96                       | 0.22                | 8.0                    |                                          | -8.1                   | -68                   | T      |
| Rio Grande Cemetery                             | 54 | 7/12/2004  | 31.481        | -106.219       | 1072 | 365       | 384                    | 0.95                       | 0.26                | 7.4                    |                                          | -6.1                   | -60                   | T      |
| Rio Grande @ Fabens*                            | 53 | 8/22/2001  | 31.457        | -106.179       | 1073 |           | 328.5                  |                            | 0.30                | 4.5                    |                                          |                        |                       | T      |

| Fort Hancock-Fort Quitman   |    |              |        |          |      |
|-----------------------------|----|--------------|--------|----------|------|
|                             |    | km           |        |          |      |
| Rio Grande at Alamo Arroyo  | 27 | 5/6/2004     | 31.313 | -105.908 | 1106 |
| Rio Grande at Alamo Arroyo  | 27 | 7/15/2004    | 31.313 | -105.908 | 1106 |
| Rio Grande @ Ft. Hancock    | 55 | 1/2/2003     | 31.273 | -105.855 | 1113 |
| Rio Grande @ Ft. Hancock    | 55 | 12/10/03     | 31.273 | -105.855 | 1113 |
| Rio Grande @ Caseta         | 55 | 3/19/2004    | 31.273 | -105.855 | 1113 |
| Rio Grande @ Ft. Hancock    | 55 | 3/20/2004    | 31.273 | -105.855 | 1113 |
| Rio Grande at Caseta        | 55 | 7/12/2004    | 31.273 | -105.855 | 1113 |
| Rio Grande at Fort Hancock  | 55 | 7/15/2004    | 31.273 | -105.855 | 1113 |
| Rio Grande at Fort Hancock  | 55 | 5/6/2004     | 31.273 | -105.855 | 1113 |
| Rio Grande at Fort Hancock* | 55 | 2003         | 31.273 | -105.855 | 1113 |
| Rio Grande at Caseta        | 55 | 5/6/2004     | 31.273 | -105.855 | 1113 |
| Rio Grande @ F              | 29 | 3/20/2004    | 31.120 | -105.662 | 1147 |
| Rio Grande at F             | 29 | 7/15/2004    | 31.120 | -105.662 | 1147 |
| Rio Grande site E           | 56 | 5/18/2003    | 31.018 | -105.576 | 1158 |
| Rio Grande @ E              | 56 | 12/10/03     | 31.018 | -105.576 | 1158 |
| Rio Grande @ E              | 56 | 3/20/2004    | 31.018 | -105.576 | 1158 |
| Rio Grande @ Fort Quitman*  | 57 | 8/22/2001    | 31.087 | -105.609 | 1152 |
| Rio Grande @ Fort Quitman*  | 57 | Summer 2003  | 31.087 | -105.609 | 1153 |
| Downstream of Fort Quitman  |    |              |        |          |      |
|                             |    | 1172-1200 km |        |          |      |
| Rio Grande @ salt fields    | 58 | 12/03        | 30.875 | -105.392 | 1185 |
| Rio Grande                  | 59 | 1/4/2003     | 30.847 | -105.360 | 1193 |
| Rio Grande site A           | 60 | 5/18/2003    | 30.824 | -105.319 | 1200 |
| Rio Grande @ A              | 60 | 12/03        | 30.824 | -105.319 | 1200 |
| Rio Grande site B           | 61 | 5/18/2003    | 30.823 | -105.325 | 1193 |
| Rio Grande site C           | 62 | 5/18/2003    | 30.890 | -105.402 | 1182 |
| Rio Grande site D           | 63 | 5/18/2003    | 30.940 | -105.480 | 1172 |

#### SOIL AMENDMENTS

|        |          |  |  |      |      |   |
|--------|----------|--|--|------|------|---|
| Gypsum | Sep 2004 |  |  | 13.0 | 13.1 | T |
| H2SO4  | Jan 2005 |  |  | 1.8  | 18.2 | T |

#### FORMATION

#### EVAPORITIC GYPSUM

|              |          |        |          |  |     |   |
|--------------|----------|--------|----------|--|-----|---|
| Neely Arroyo | Jan 2003 | 31.019 | -105.568 |  | 7.4 | T |
| Neely Arroyo | Jan 2003 | 31.019 | -105.568 |  | 5.9 | T |

| 869  | 722   | 1.20 | 0.14 |      |      | T |
|------|-------|------|------|------|------|---|
| 946  | 751   |      |      | 5.0  |      | T |
| 421  | 407   | 1.03 | 0.25 |      | -8.5 | T |
| 471  | 390   | 1.21 | 0.26 |      | -8.7 | T |
| 479  | 447   | 1.07 | 0.22 | 9.6  | 7.9  | T |
| 880  | 812   | 1.08 | 0.12 | 4.2  | 9.1  | T |
| 405  | 344   | 1.18 | 0.29 | 12.9 | 10.1 | T |
| 919  | 821   | 1.12 | 0.12 | 5.2  |      | T |
| 833  | 746   | 1.12 | 0.13 |      | -6.6 | T |
|      | 681   |      | 0.15 | 4.4  |      | T |
| 473  | 454   | 1.04 | 0.22 |      |      | T |
| 1181 | 1062  | 1.11 | 0.09 | 5.0  | -6.1 | T |
| 1200 | 1102  | 1.09 | 0.09 | 4.9  |      | T |
|      | 982   |      | 0.10 | 5.3  | -5.1 | T |
| 677  | 516   | 1.31 | 0.19 |      | -8.1 | T |
| 1565 | 1173  | 1.33 | 0.09 | 5.5  | 9.4  | T |
|      | 730.5 |      | 0.14 | 4.0  |      | T |
|      | 1110  |      | 0.09 | 5.1  |      | T |
| 676  | 530   | 1.28 | 0.19 |      | -8.1 | T |
|      | 597   |      | 0.17 | 9.1  | -8.1 | T |
|      | 1027  |      | 0.10 | 5.9  | -4.5 | T |
| 688  | 534   | 1.29 | 0.19 |      | -8.0 | T |
|      | 1041  |      | 0.10 | 5.2  | -4.5 | T |
|      | 961   |      | 0.10 | 5.2  | -5.1 | T |
|      | 939   |      | 0.11 | 5.1  | -4.4 | T |

Explanation: m bgs = meters below ground surface; T = this study; U = unpublished data of Barry Hibbs and Mercedes Merino; [15], [18], [19], [34]: see references in article.  
Site numbers refer to sample location maps, Fig. S1, for previously unpublished data only.  
km = kilometers from source of Rio Grande
