# Supplementary material
Source: MDPI journal article supplement (https://www.mdpi.com/2306-5338/9/6/95)

105.78 W

105.13 W

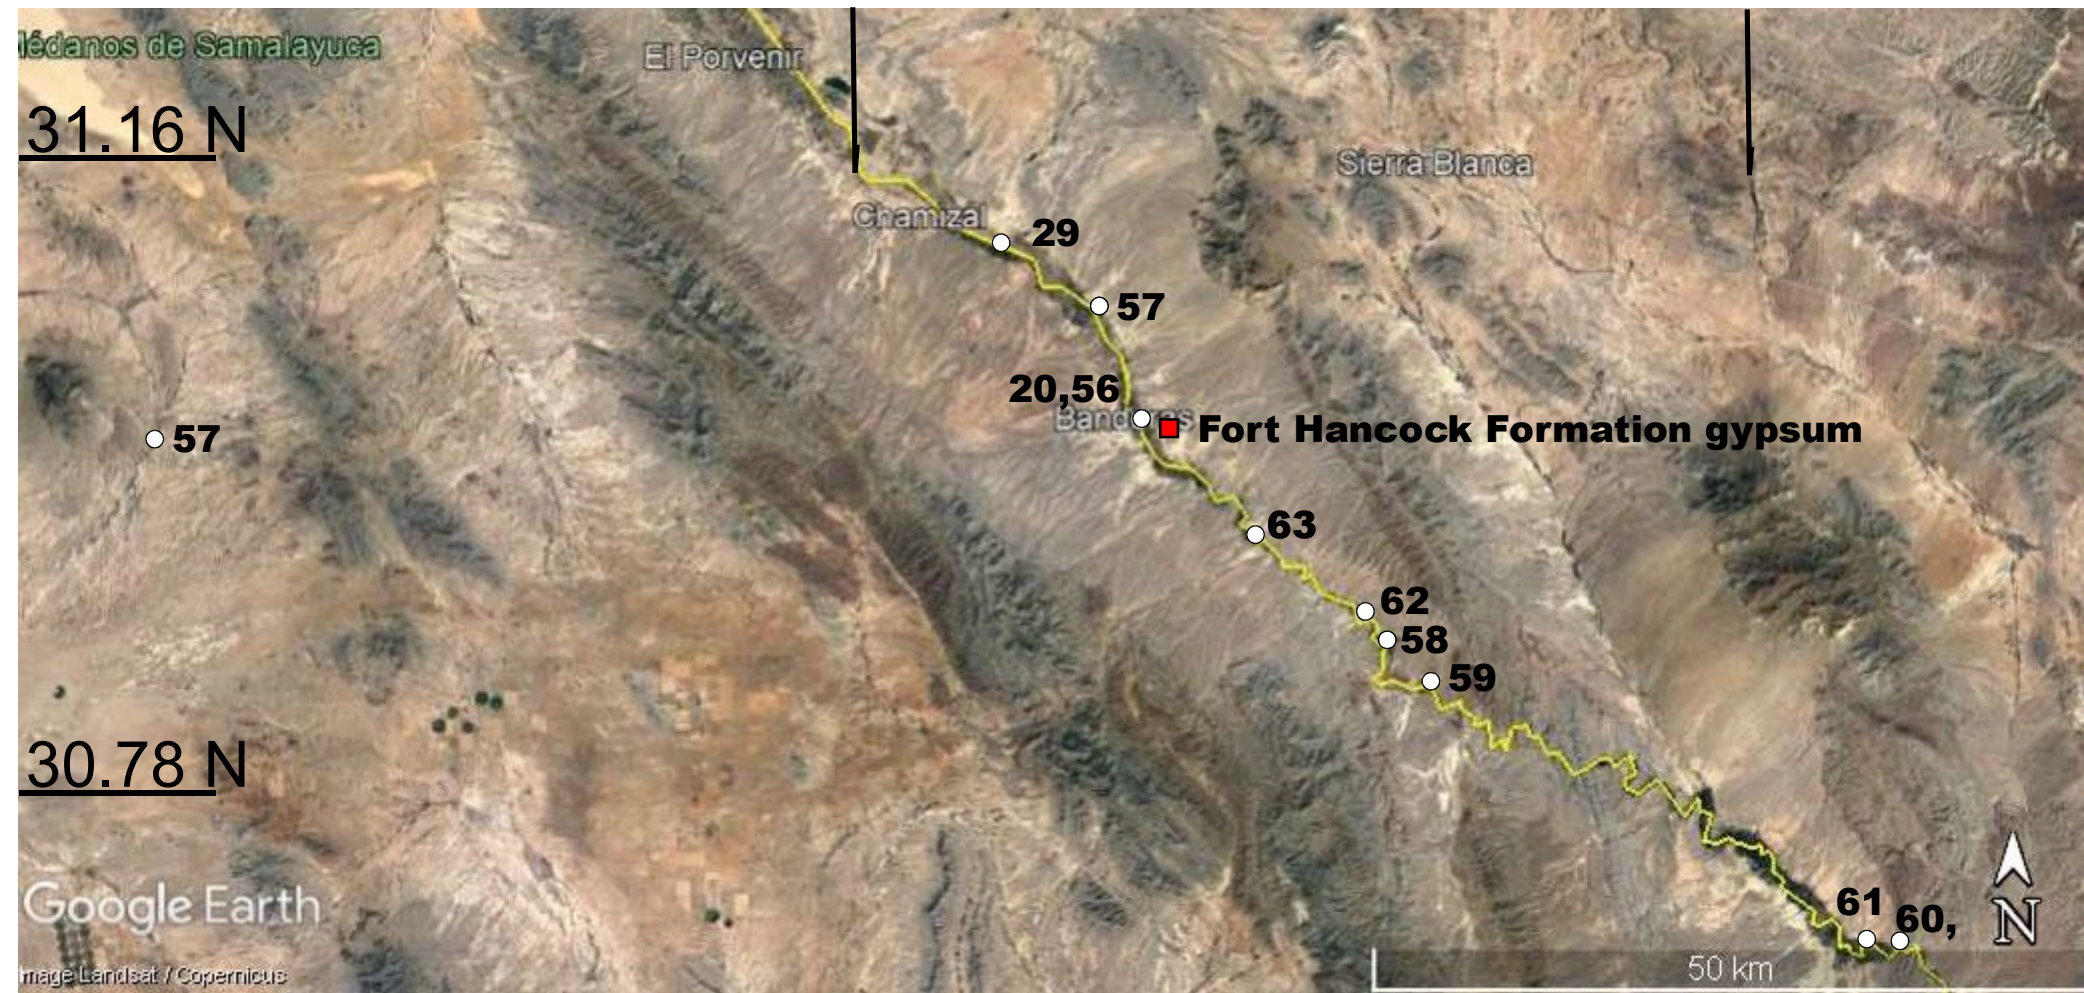

Sample locations: Fort Quitman to Indian Hot Springs

Supplement: s1 [file s1]

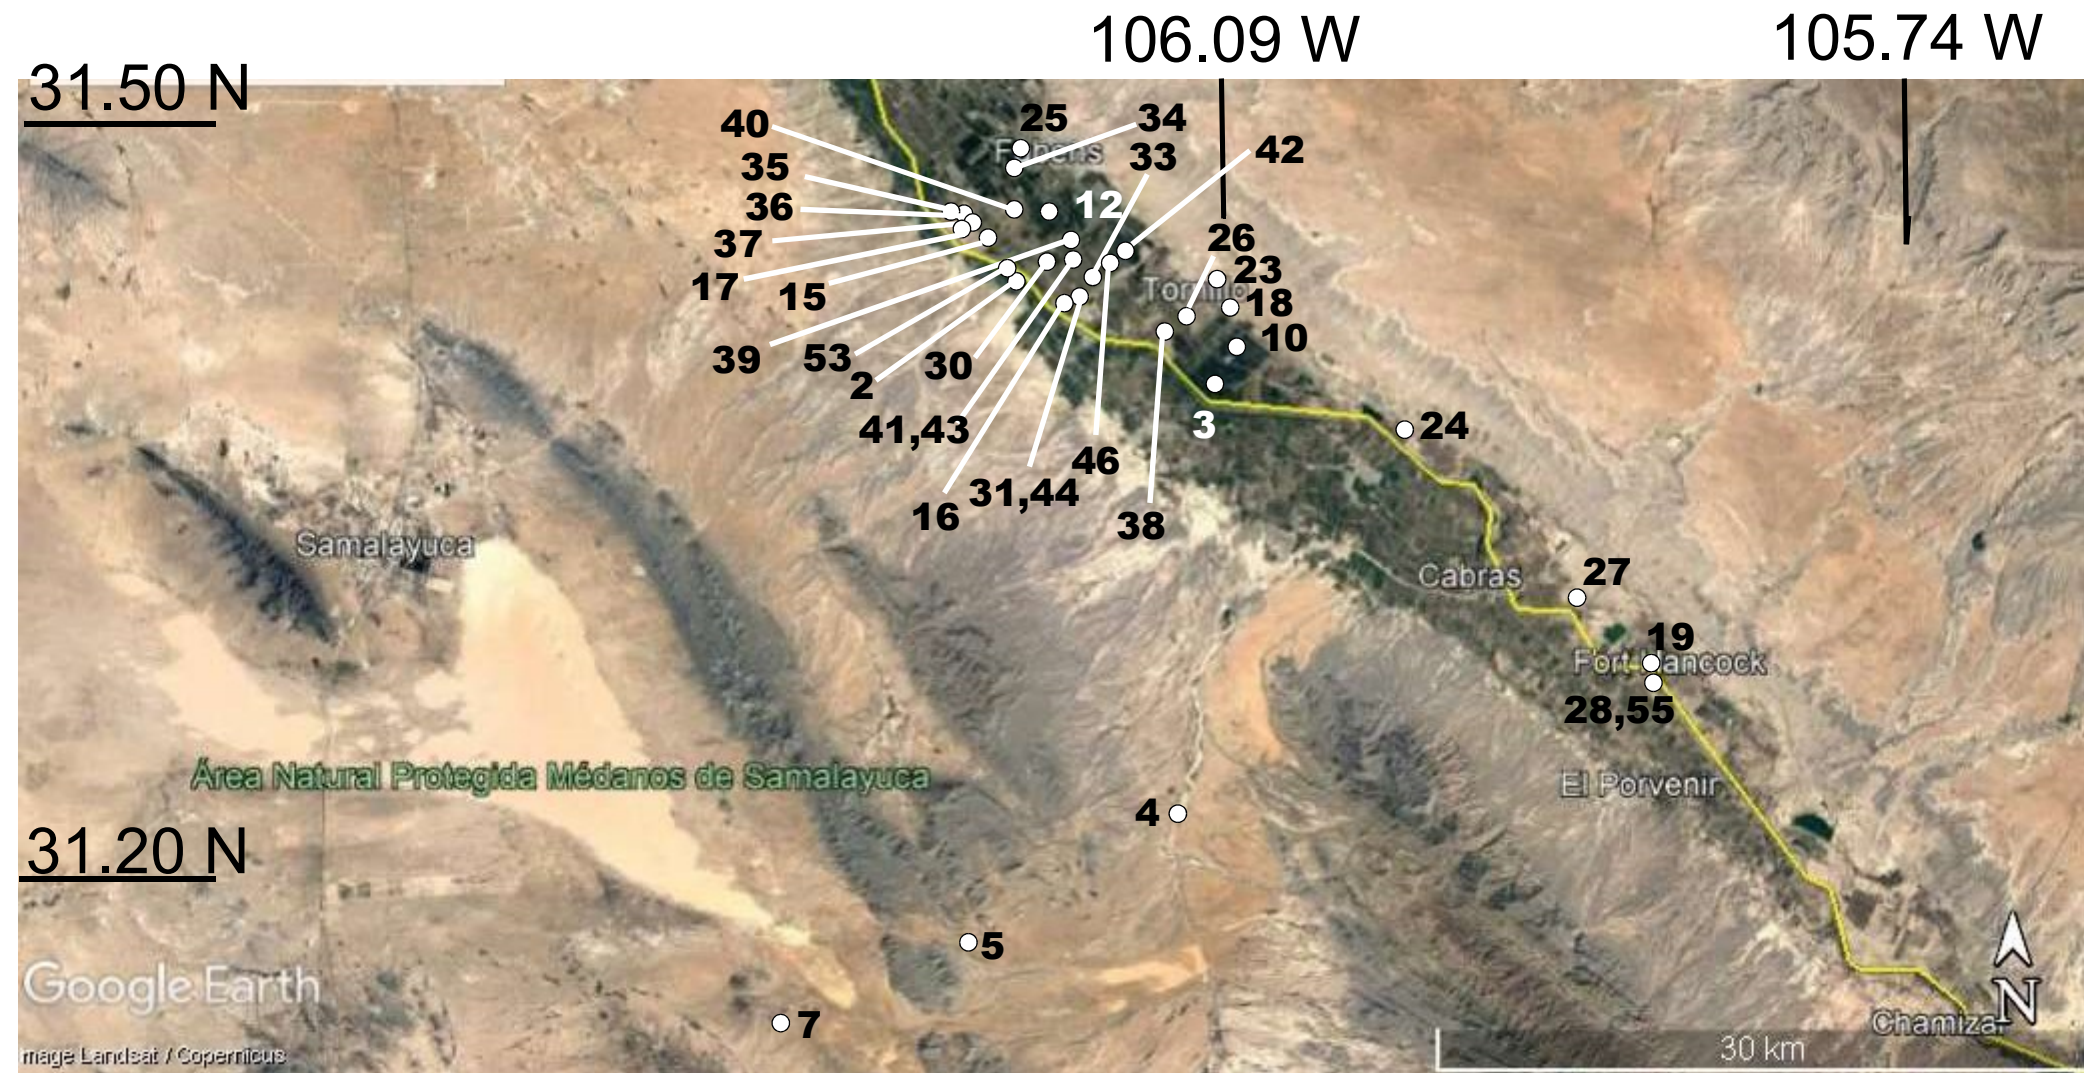

Sample locations: Fabens to Fort Quitman

Supplement: s1 [file s1]

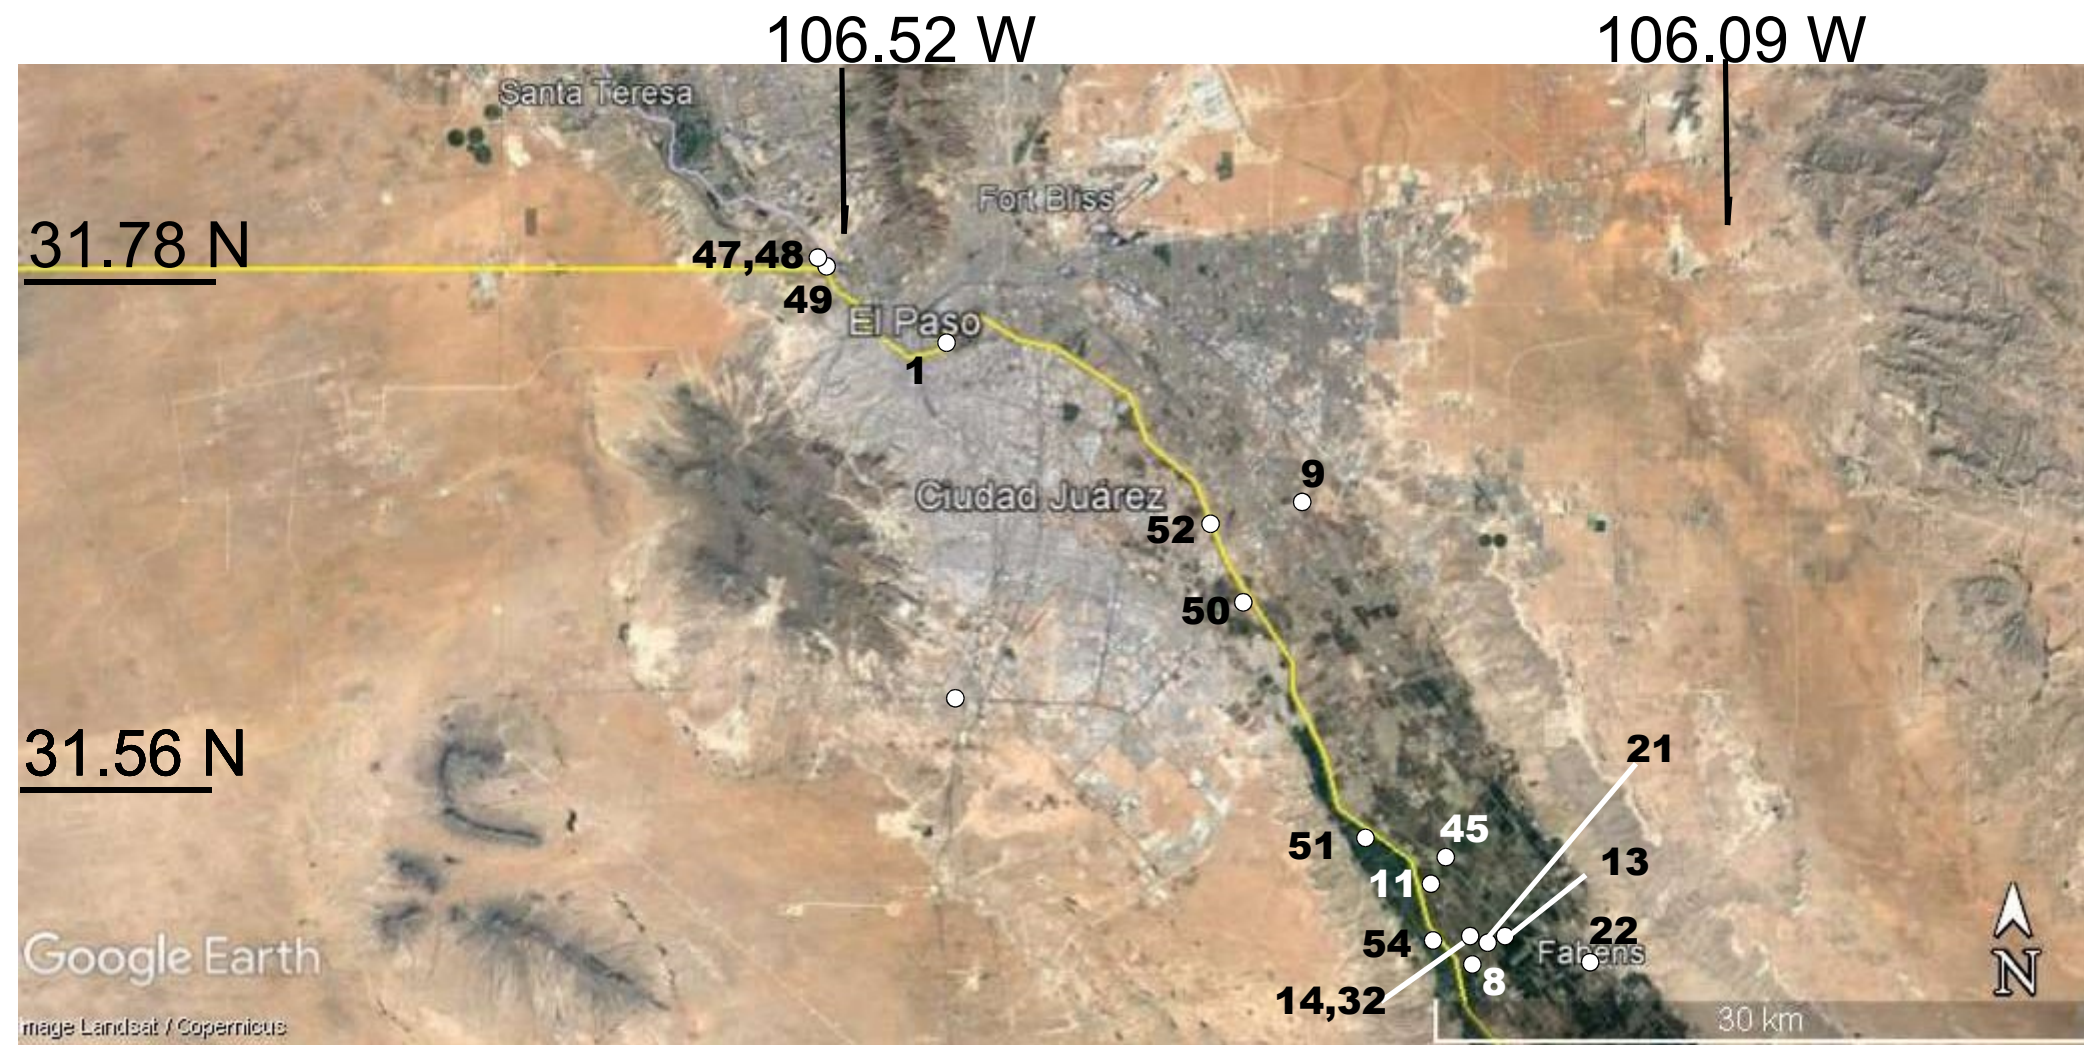

Sample locations: Sunland Park to Fabens

Supplement: s1 [file s1]
